# Supplementary material
Source: PubMed Central journal article supplement (PMC2915943)

Figure 1

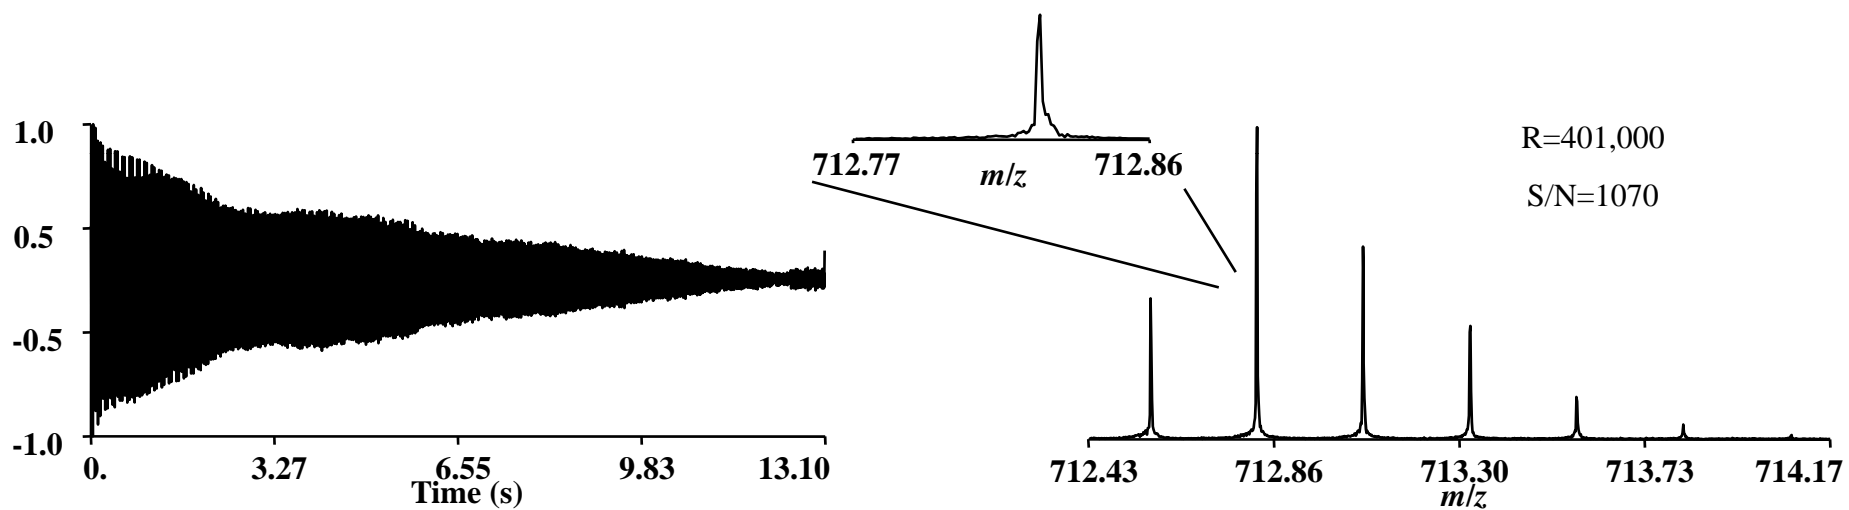

Figure 2

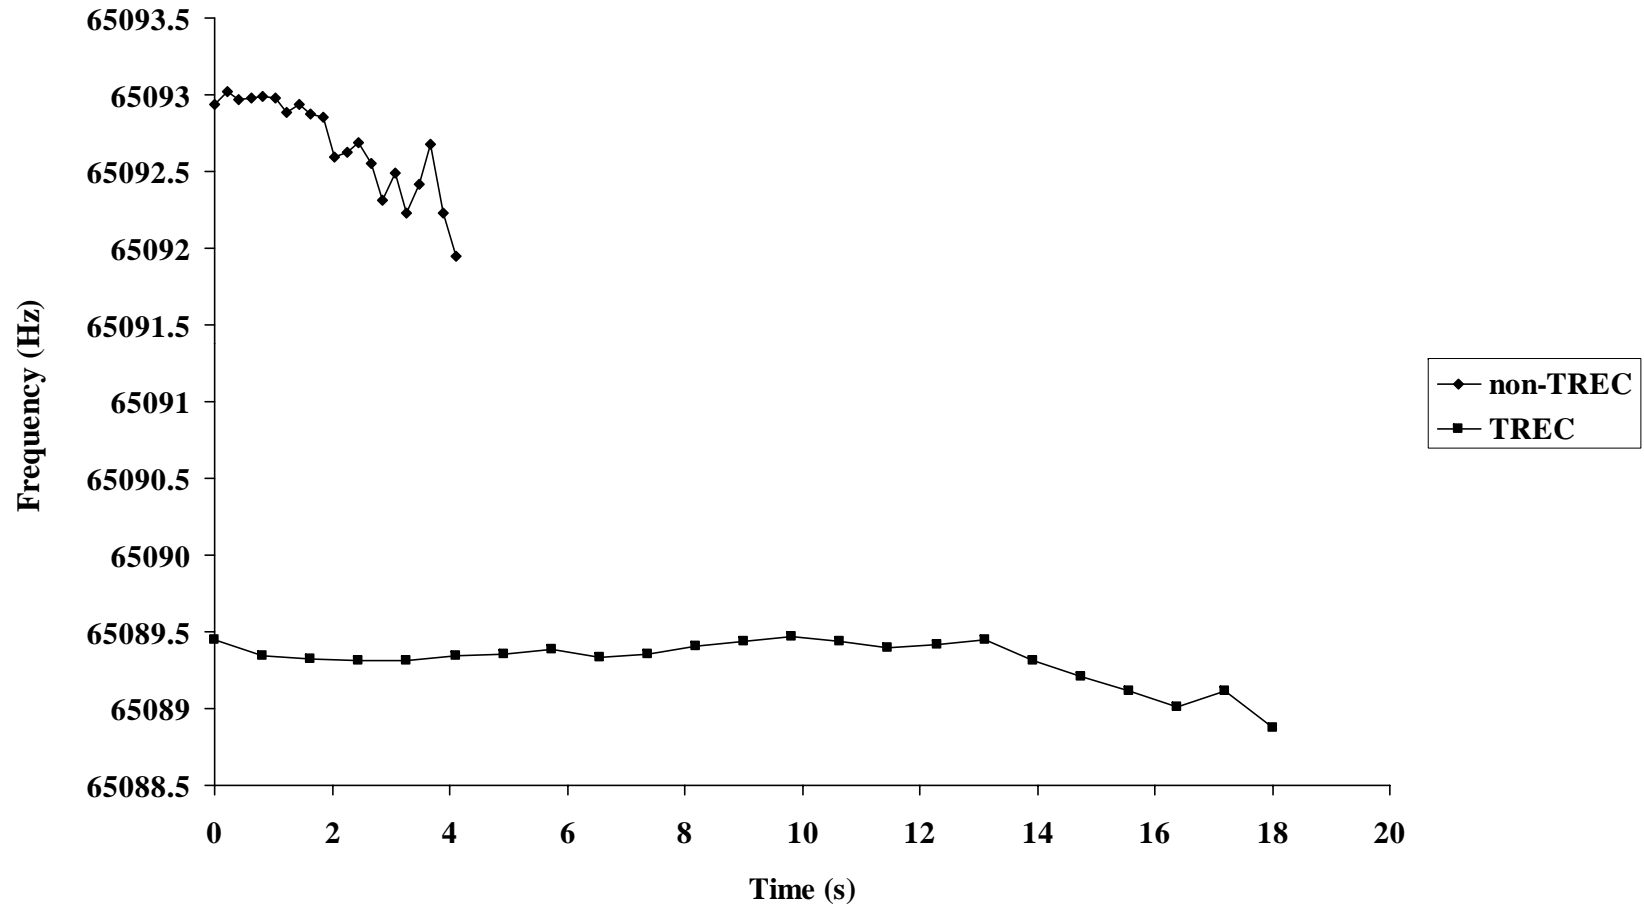

Figure 3

a)

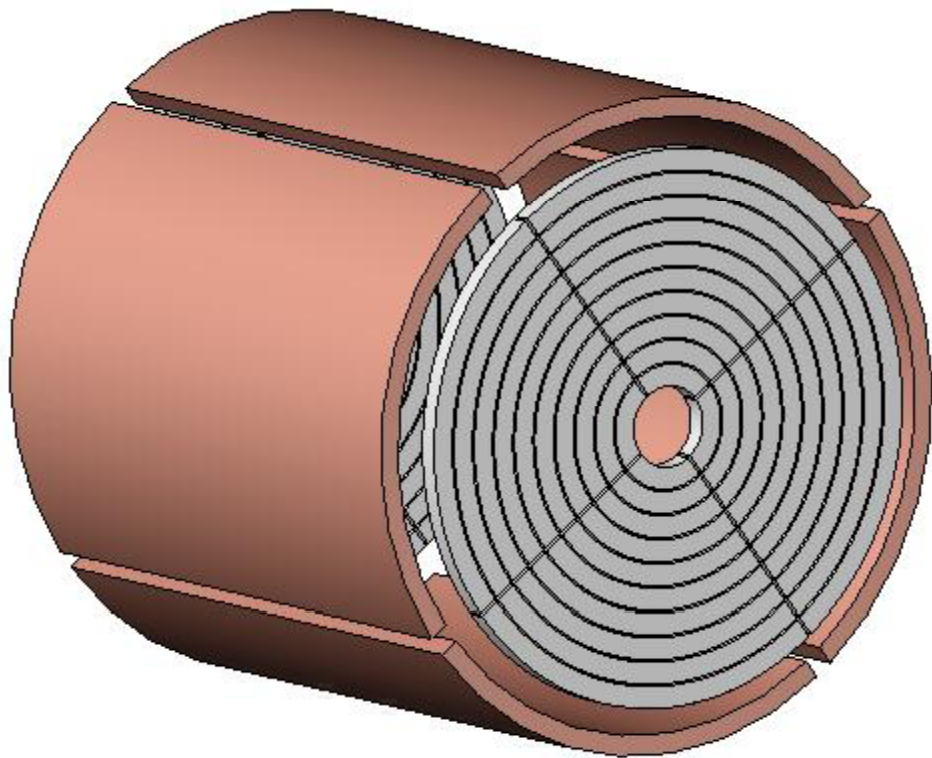

b)

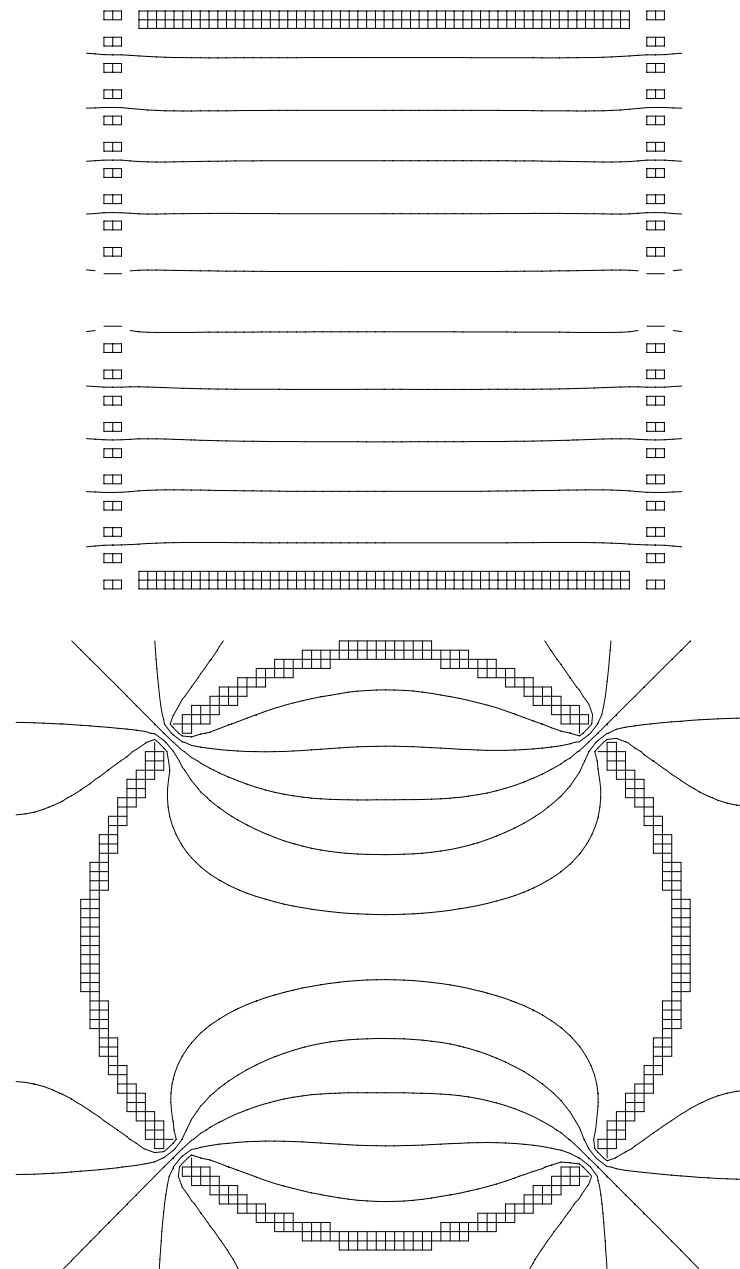

Figure 4

a)

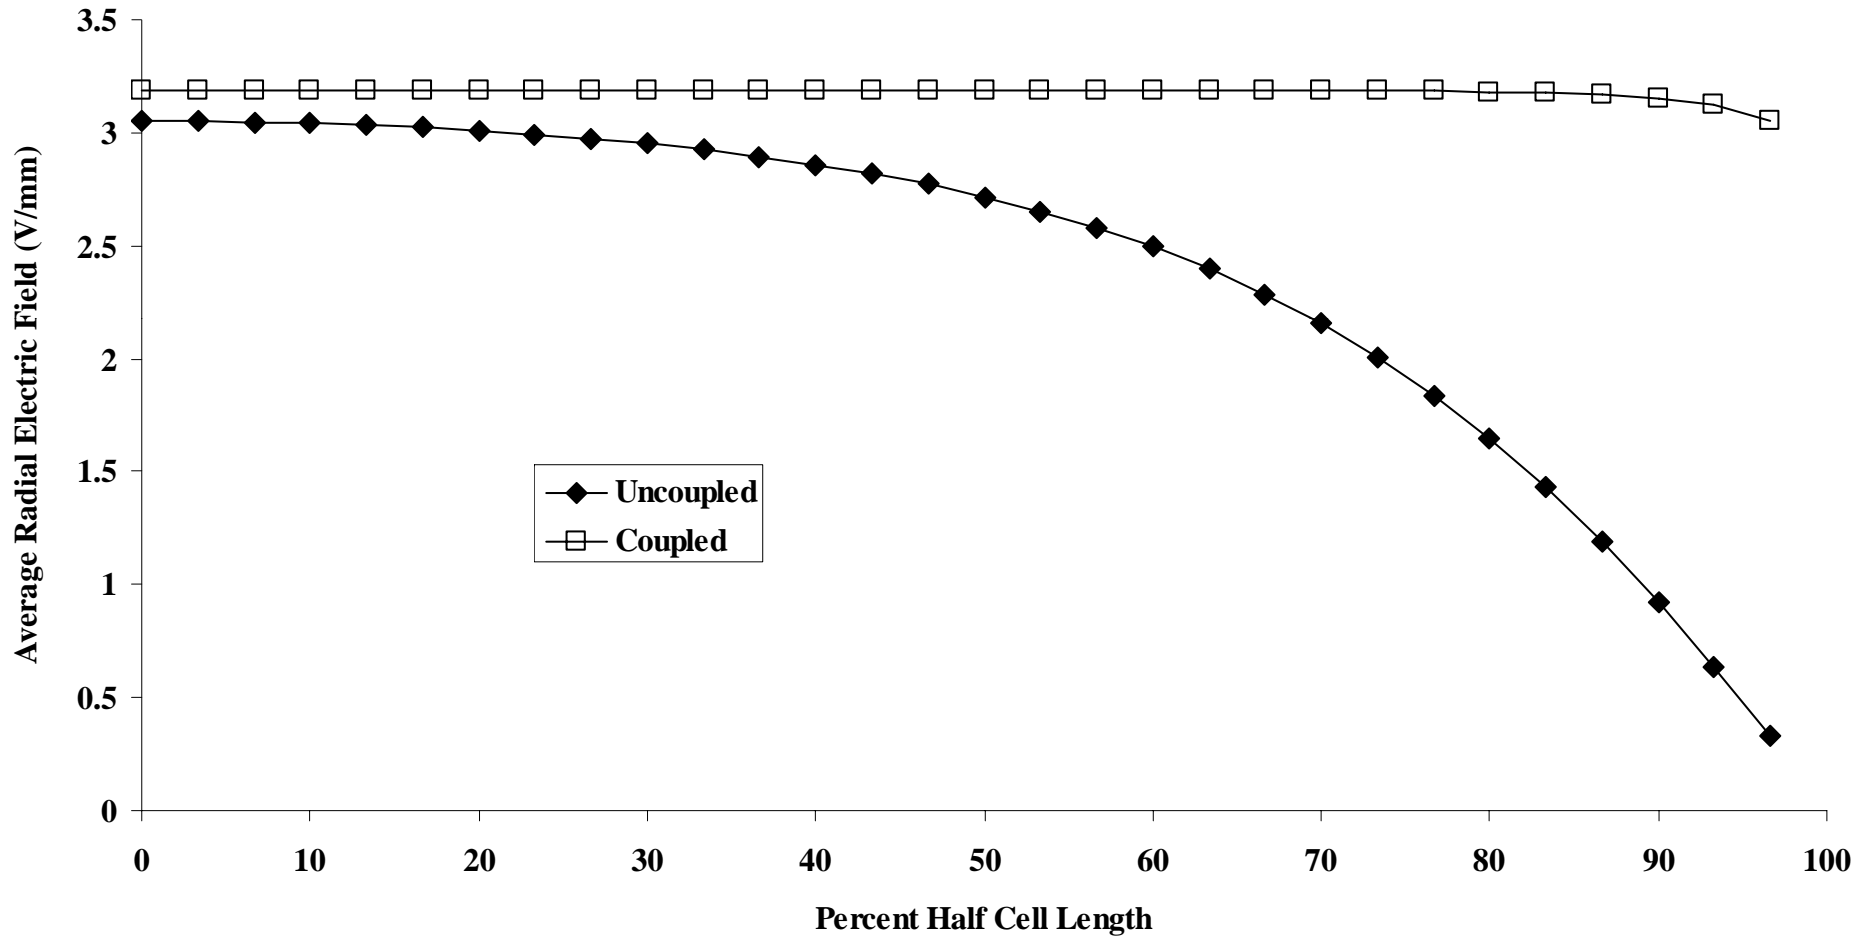

Figure 4

b)

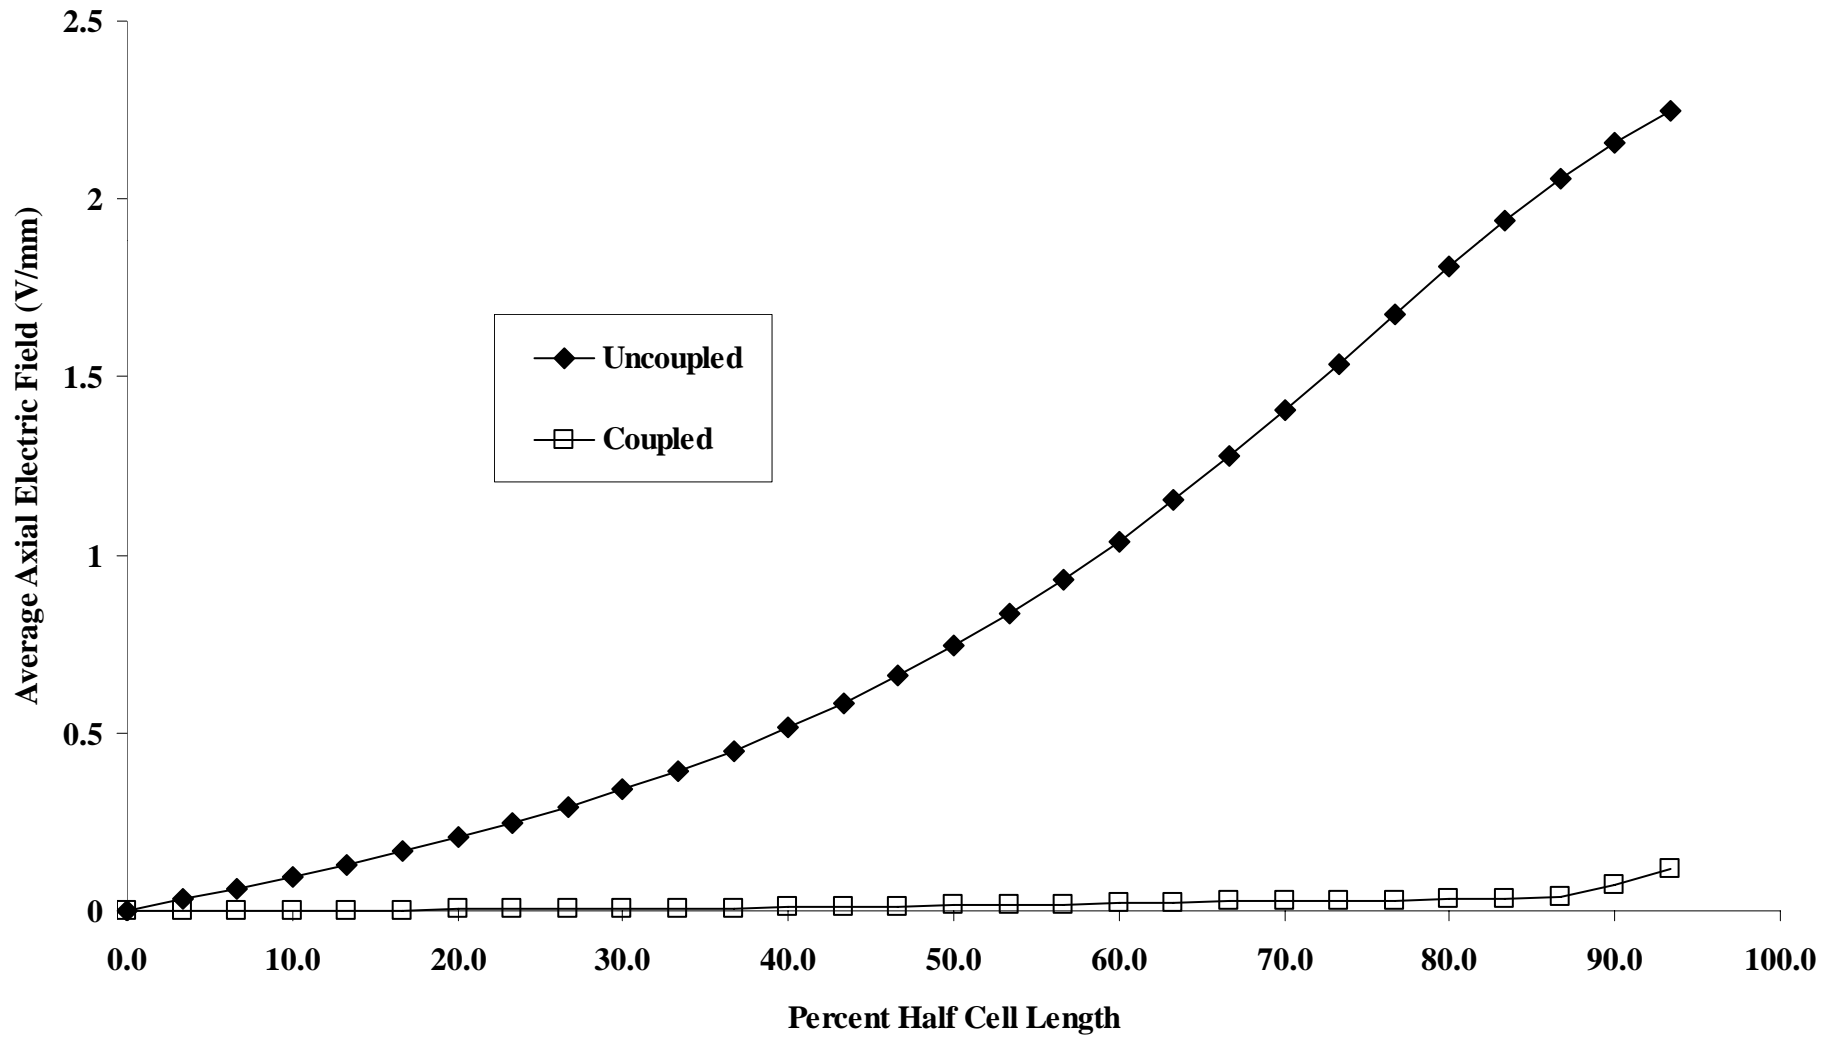

Supplement: NIHMS217617-supplement-Supplemental_Figures.pdf [file NIHMS217617-supplement-Supplemental_Figures.pdf]
